# Supplementary material for: Image-Based Evaluation of Cracking Degrees on Wood Fiber Bundles: A Machine Learning Approach
Source: MDPI journal article supplement (doi:10.3390/f15040698), 2024-04-14
Supplement: s1 [file s1]

## **Supplementary Materials:**

# **Image-Based Evaluation of Cracking Degrees on Wood Fiber Bundles: A Machine Learning Approach**

Research Institute of Wood Industry, Chinese Academy of Forestry,  
Beijing 100091, China;  
victor\_chai@foxmail.com (Z.C.); heng\_vision@163.com (H.L.);  
guohaomeng8@outlook.com (H.G.)  
\* Correspondence: yjh@caf.ac.cn

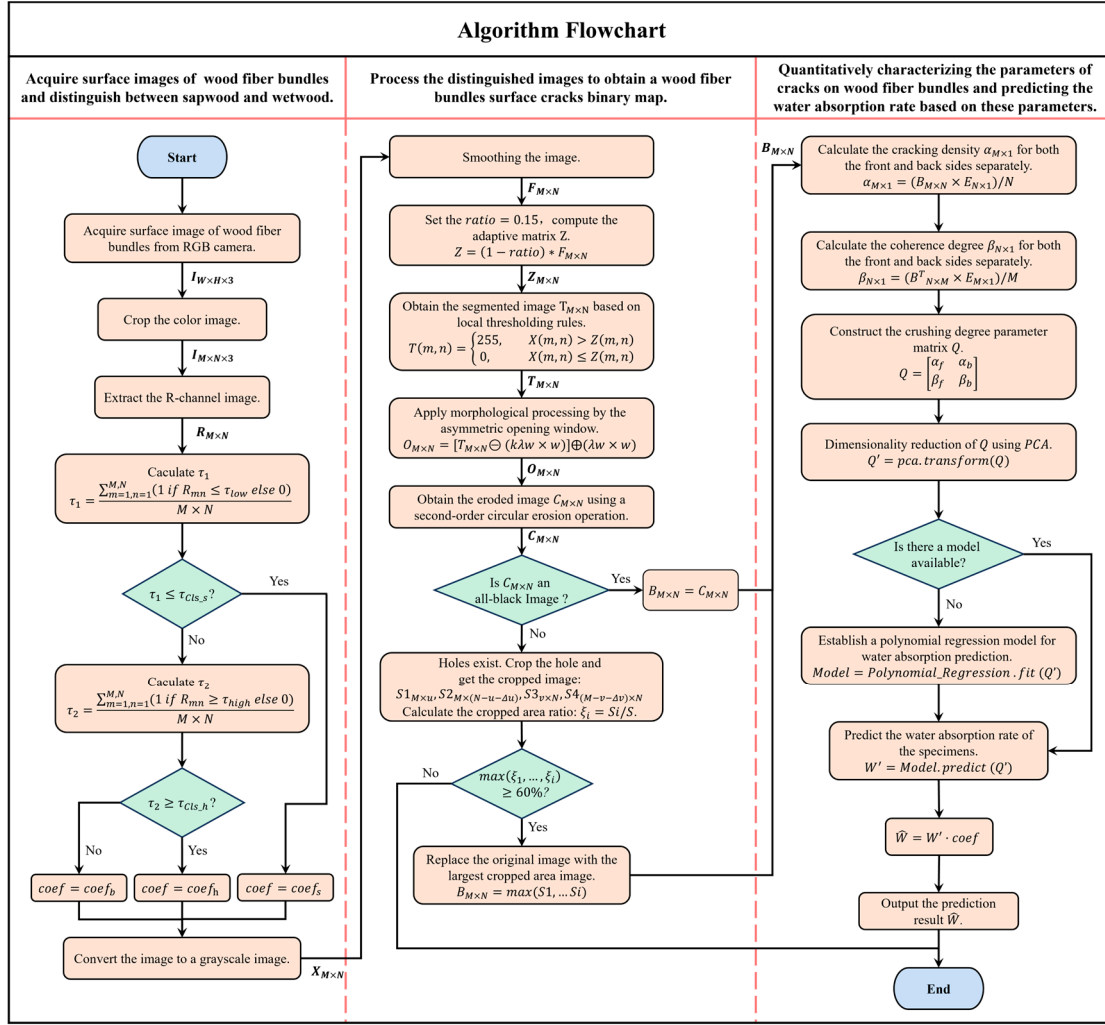

**Figure S1.** Flowchart of the algorithm for predicting WAR of WFB.

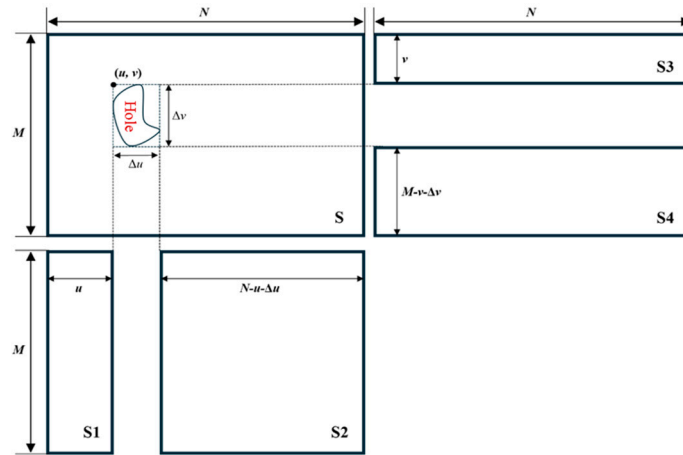

**Figure S2.** Schematic diagram of hole cropping.
